# Supplementary material for: Estimates of carbon sequestration potential in an expanding Arctic fjord (Hornsund, Svalbard) affected by dark plumes of glacial meltwater
Source: Copernicus journal article supplement (doi:10.5194/bg-21-3617-2024), 2024-08-20
Supplement: Supplementary file 1 [file bg-21-3617-2024-supplement.pdf]

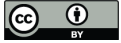

*Supplement of*

## **Estimates of carbon sequestration potential in an expanding Arctic fjord (Hornsund, Svalbard) affected by dark plumes of glacial meltwater**

**Marlena Szeligowska et al.**

*Correspondence to:* Marlena Szeligowska (lena@iopan.pl)

The copyright of individual parts of the supplement might differ from the article licence.

Table S1 List of satellite images used in this study

| Year | Satellite images                         | Resolution [m] | Bands       |
|------|------------------------------------------|----------------|-------------|
| 1976 | LM02_L1GS_230004_19760718_20180423_01_T2 | 60             | 3-2-1       |
| 1980 | LM02_L1GS_229005_19800801_20210624_02_T2 | 60             | 4           |
| 1985 | LM05_L1GS_211005_19850726_20210919_01_T2 | 60             | 3-2-1       |
| 1990 | LM05_L1GS_212005_19900901_20211008_02_T2 | 30             | 3-2-1       |
| 1995 | LT05_L1TP_208005_19950903_20200912_02_T2 | 30             | 3-2-1       |
| 2000 | LE07_L1TP_213005_20000725_20200918_02_T1 | 15             | 3-2-1 and 8 |
|      | LE07_L1TP_209005_20000729_20200917_02_T1 |                |             |
| 2006 | LT05_L1TP_210005_20060814_20201008_02_T2 | 30             | 3-2-1       |
| 2010 | LE07_L1TP_210005_20100817_20200910_02_T1 | 15             | 3-2-1 and 8 |
| 2015 | LC08_L1TP_209005_20150731_20200908_02_T1 | 15             | 4-3-2 and 8 |
| 2019 | LC08_L1TP_212005_20190816_20190902_01_T1 | 15             | 4-3-2 and 8 |
| 2022 | LC08_L1TP_028239_20220815_20220823_02_T2 | 15             | 4-3-2 and 8 |

Table S2 Location of the data points

| Variable                                                                 | Data type      | Location                                                     |
|--------------------------------------------------------------------------|----------------|--------------------------------------------------------------|
| Sea surface temperature (SST)                                            | Satellite data | HOR: 77.000°N 15.325°E; 77.000°N 15.375°E; 77.000°N 15.425°E |
| Sea ice concentration (SIC)                                              |                | HOR: 76.950°N 16.225°E; 76.950°N 16.275°E; 76.950°N 16.325°E |
| Suspended particulate matter (SPM),<br>sedimentation flux (SF), salinity | Field data     | M5 (H1_11): 77.017°N 15.636°E                                |
|                                                                          |                | M4 (H1_09): 77.012°N 15.629°E                                |
|                                                                          |                | M3 (H1_08): 77.009°N 15.624°E                                |
|                                                                          |                | M2 (H1_06): 77.003°N 15.624°E                                |
|                                                                          |                | M1 (H1_04): 70.000°N 15.623°E                                |
| Air temperature (AT) and precipitation                                   |                | PPS (Polish Polar Station Hornsund): 77.000°N 15.550°E       |

Table S3 List of state variables

| N  | Abbr.                   | Definition                                                       | Initial value | Unit                   |
|----|-------------------------|------------------------------------------------------------------|---------------|------------------------|
| 1  | <i>F</i>                | Flagellates                                                      | 0.1           | mgC·m <sup>-3</sup>    |
| 2  | <i>D</i>                | Diatoms                                                          | 0.1           | mgC·m <sup>-3</sup>    |
| 3  | <i>Chl<sub>F</sub></i>  | Chlorophyll <i>a</i> for flagellates (prognostic state variable) | 0.005         | mgC·m <sup>-3</sup>    |
| 4  | <i>Chl<sub>D</sub></i>  | Chlorophyll <i>a</i> for diatoms (prognostic state variable)     | 0.005         | mgC·m <sup>-3</sup>    |
| 5  | <i>Z<sub>S</sub></i>    | Microzooplankton                                                 | 0.01          | mgC·m <sup>-3</sup>    |
| 6  | <i>Z<sub>L</sub></i>    | Mesozooplankton                                                  | 0.01          | mgC·m <sup>-3</sup>    |
| 7  | <i>MB</i>               | Macrobenthos                                                     | 0.5           | mgC·m <sup>-3</sup>    |
| 8  | <i>iSPM</i>             | Inorganic Suspended Particulate Matter                           | 0.0           | mg·m <sup>-3</sup>     |
| 9  | <i>D<sub>1</sub></i>    | Fast sinking detritus                                            | 0.0           | mgC·m <sup>-3</sup>    |
| 10 | <i>D<sub>2</sub></i>    | Slow sinking detritus                                            | 0.1           | mgC·m <sup>-3</sup>    |
| 11 | <i>DOM</i>              | Dissolved Organic Matter                                         | 3.0           | mgC·m <sup>-3</sup>    |
| 12 | <i>NH<sub>4</sub></i>   | Ammonium                                                         | 50.0          | mmolN·m <sup>-3</sup>  |
| 13 | <i>NO<sub>3</sub></i>   | Nitrate                                                          | 1035.0        | mmolN·m <sup>-3</sup>  |
| 14 | <i>PO<sub>4</sub></i>   | Phosphate                                                        | 1100.0        | mmolP·m <sup>-3</sup>  |
| 15 | <i>SiO<sub>2</sub></i>  | Silicate                                                         | 300.0         | mmolSi·m <sup>-3</sup> |
| 16 | <i>Opal</i>             | Biogenic Opal                                                    | 2.0           | mmolSi·m <sup>-3</sup> |
| 17 | <i>O<sub>2</sub></i>    | Oxygen                                                           | 85.0          | ml·l <sup>-1</sup>     |
| 18 | <i>S<sub>CN</sub></i>   | Sediment Carbon Nitrogen                                         | 0.0           | mg·m <sup>-3</sup>     |
| 19 | <i>S<sub>P</sub></i>    | Sediment Phosphate                                               | 0.0           | mgC·m <sup>-3</sup>    |
| 21 | <i>S<sub>S</sub></i>    | Sediment Silicate                                                | 0.0           | mgC·m <sup>-3</sup>    |
| 22 | <i>S<sub>iSPM</sub></i> | Sediment iSPM                                                    | 0.0           | mgC·m <sup>-3</sup>    |

Table S4 The Spearman's correlation between results of simulations (station 2 in 2006 and 2009) and field studies (stations M4 and M5 in 2019) plotted in Sup. Fig. 3.

| Station (year) | M4 (2019)           | M5 (2019)           |
|----------------|---------------------|---------------------|
| 2 (2006)       | Rho = 0.74, p<0.001 | Rho = 0.77, p<0.001 |
| 2 (2009)       | Rho = 0.75, p<0.001 | Rho = 0.79, p<0.001 |

Table S5 Literature data for model assessment in the West Spitsbergen fjords: KGF – Kongsfjorden, HOR – Hornsund, ISF – Isfjorden, Rij - Rijpfjorden

| Variable                                                                                        | KGF                                | HOR                       | ISF | RIJ         | Reference                                                                                                      |
|-------------------------------------------------------------------------------------------------|------------------------------------|---------------------------|-----|-------------|----------------------------------------------------------------------------------------------------------------|
| <b>Silicate</b> [ $\mu\text{mol}\cdot\text{l}^{-1}$ ]                                           | 1.9 -6.0                           | 1.0 -6.0                  |     |             | Hegseth and Tverberg 2013;                                                                                     |
| <b>Nitrates</b> [ $\mu\text{mol}\cdot\text{l}^{-1}$ ]                                           | <0.67                              | <1.96                     |     |             | Węśławski et al. 1988;                                                                                         |
| <b>Phosphates</b> [ $\mu\text{mol}\cdot\text{l}^{-1}$ ]                                         | 0.83                               | 0.3                       |     |             | Hodal et al. 2012<br>Eilertsen et al. 1989;<br>Węśławski et al. 1988;<br>Hodal et al. 2012;                    |
| <b>Ice algae</b> [ $\text{mgC}\cdot\text{m}^{-2}$ ]                                             |                                    |                           |     | 50 – 450    | Leu et al., 2017                                                                                               |
| <b>Phytoplankton</b> [ $\text{gC}\cdot\text{m}^{-2}$ ]                                          | 0.254 – 2.77                       | 0.608 - 2.1               |     | <0.002      | Piwosz et al., 2009<br>Błachowiak-Samołyk et al., 2015                                                         |
| <b>Zooplankton</b> [ $\text{gC}\cdot\text{m}^{-2}$ ]                                            |                                    |                           | 1-6 | 6-8         | Zajączkowski et al., 2010<br>Błachowiak-Samołyk et al., 2015                                                   |
| <b>Macrobenthos</b> [ $\text{gC}\cdot\text{m}^{-2}$ ]                                           | 4.8 – 7.73                         | 6.44 – 20.48              |     | 2.31 – 8.34 | Włodarska-Kowalczyk et al., 2019                                                                               |
| <b>Summer pelagic primary production</b> [ $\text{mgC}\cdot\text{m}^{-2}\cdot\text{day}^{-1}$ ] | 59 -108<br>80 - 155                | 173 - 1333                |     |             | Piwosz et al., 2009<br>Iversen and Seuthe, 2011                                                                |
| <b>Spring pelagic primary production</b> [ $\text{mgC}\cdot\text{m}^{-2}\cdot\text{day}^{-1}$ ] | 405 - 445<br>30 - 1850             | 320 - 2770                |     |             | Iversen and Seuthe, 2011<br>Hodal et al., 2012<br>Vonnahme et al., 2021                                        |
| <b>Zoobenthos production</b> [ $\text{gC}\cdot\text{m}^{-2}\cdot\text{y}^{-1}$ ]                | 9.4<br>2.1 – 6.6                   | 19.2<br>1.2 – 2.6         |     |             | Włodarska-Kowalczyk et al., 2019<br>Zaborska et al., 2018 (only macro.)                                        |
| <b>Burial rate of OC</b> [ $\text{gC}\cdot\text{m}^{-2}\cdot\text{y}^{-1}$ ]                    | 28 ± 6<br>9 - 13<br>5.7-10.0<br>15 | 28 ± 1<br>19.3-30.3<br>38 |     |             | Włodarska-Kowalczyk et al., 2019<br>Kuliński et al., 2014<br>Koziorowska et al., 2018<br>Zaborska et al., 2018 |

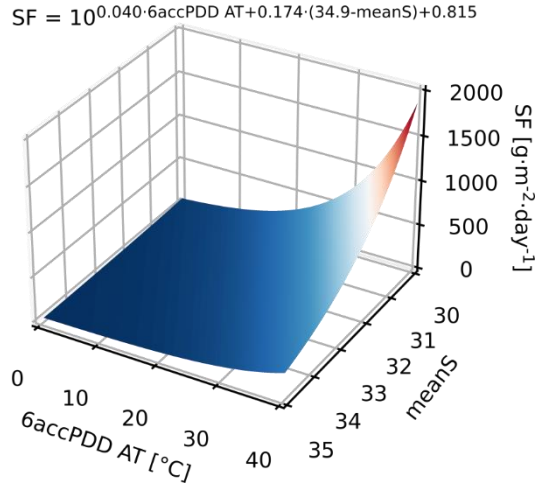

Figure S1 Inorganic sediment flux as a function of 6accPDD AT and mean salinity. 6accPDD is the accumulated daily temperature for positive degree days for 6 days window ( $^{\circ}\text{C}$ ), 34.9 is a reference salinity for Atlantic Water (Moskalik et al., 2018), and meanS is the mean salinity above the sediment trap.

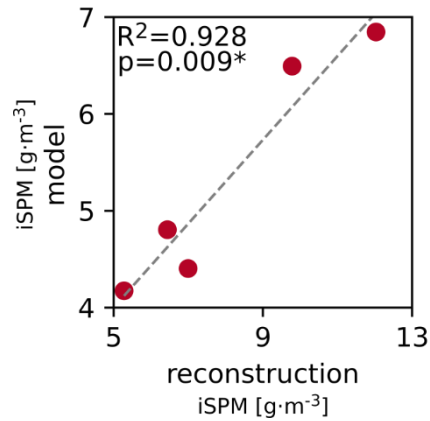

Figure S2 Assessment of inorganic SPM (iSPM) simulations at station HH1 (2): correlation of mean summer-time integrated iSPM concentration from reconstruction and model for 2005-2009 ( $\text{g}\cdot\text{m}^{-3}$ ).

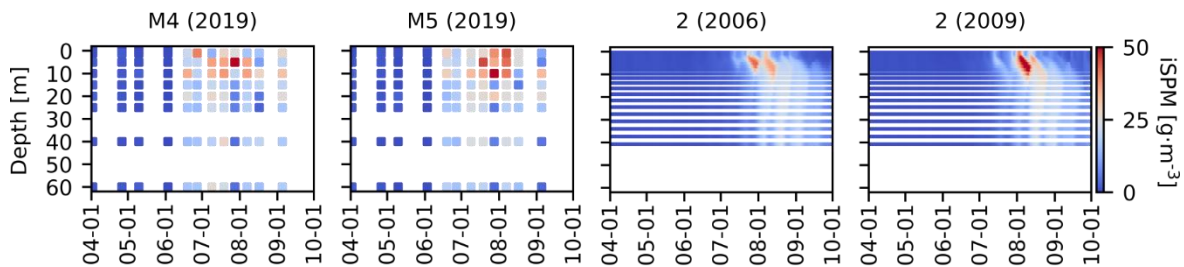

Figure S3 Inorganic SPM concentration (iSPM,  $\text{g}\cdot\text{m}^{-3}$ ) at monitoring stations (M4 and M5) in 2019 and at modelled station (2) in 2006 and 2009.

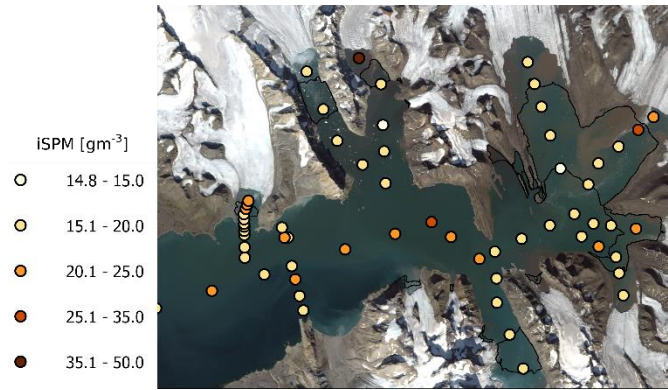

Figure S4 Spatial distribution of inorganic SPM (iSPM) concentrations in Hornsund in summer 2017 (late July-early August, 0 m). The black lines indicate newly ice-free areas extent in 2006. Landsat8 satellite image (04/08/2020) downloaded from <https://glovis.usgs.gov/app>.

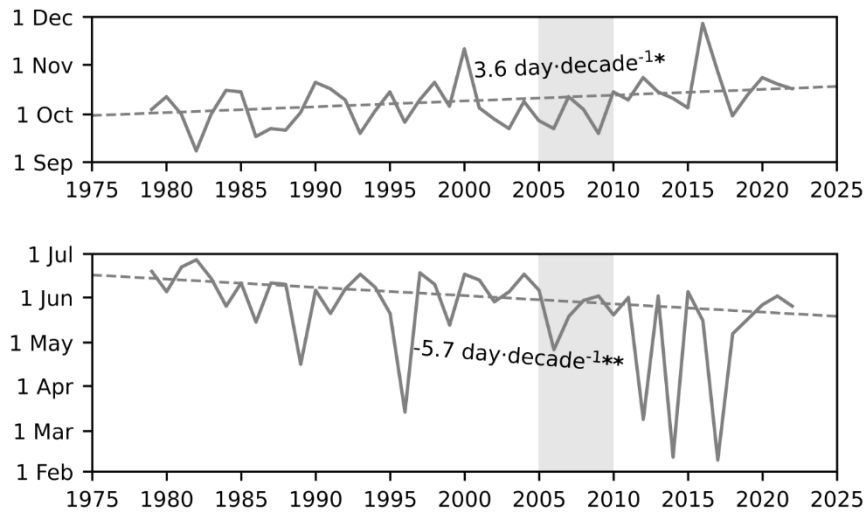

Figure S5 The trends in the start and end of the melt season in Hornsund defined as the start of the first six consecutive days when daily average air temperatures exceed or fall below 0°C, respectively. \*  $p < 0.05$ , \*\*  $p < 0.001$  for Modified Mann Kendall Test.

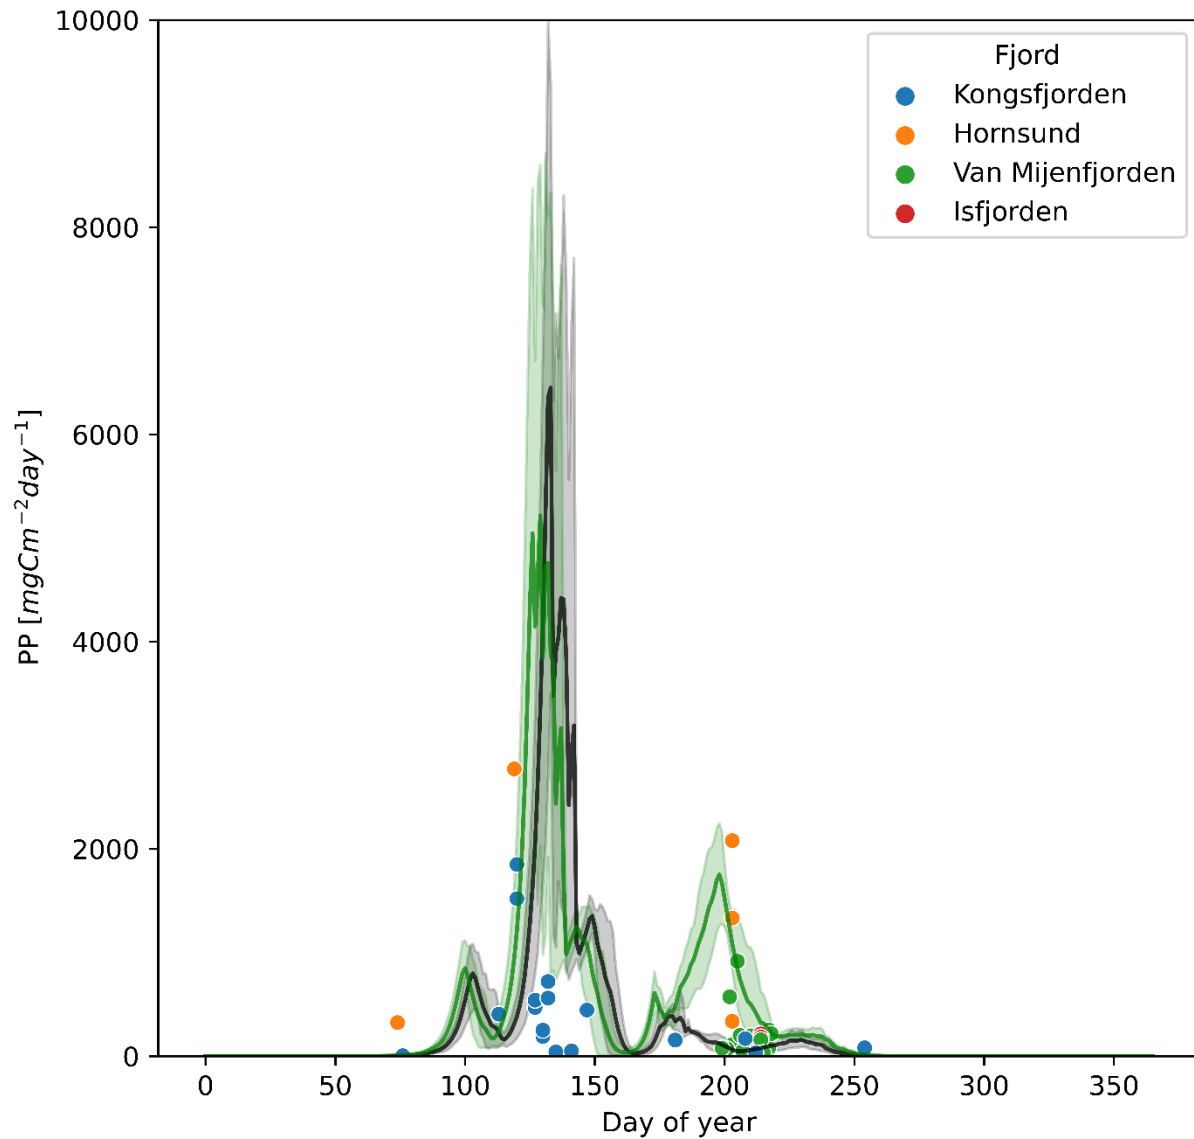

Figure S6 Comparison of pelagic primary production from the modeling (station H3, black - iSPM scenario, green - noSPM scenario; average for 2005-2009 with standard deviation) and field studies as reported by Hodal et al., 2012 (Kongsfjorden), Iversen and Seuthe 2011 (Kongsfjorden), Piwosz et al., 2009 (Kongsfjorden and Hornsund), Eilertsen et al., 1989 (Kongsfjorden, Isfjorden, Van Mijenfjorden and Hornsund).

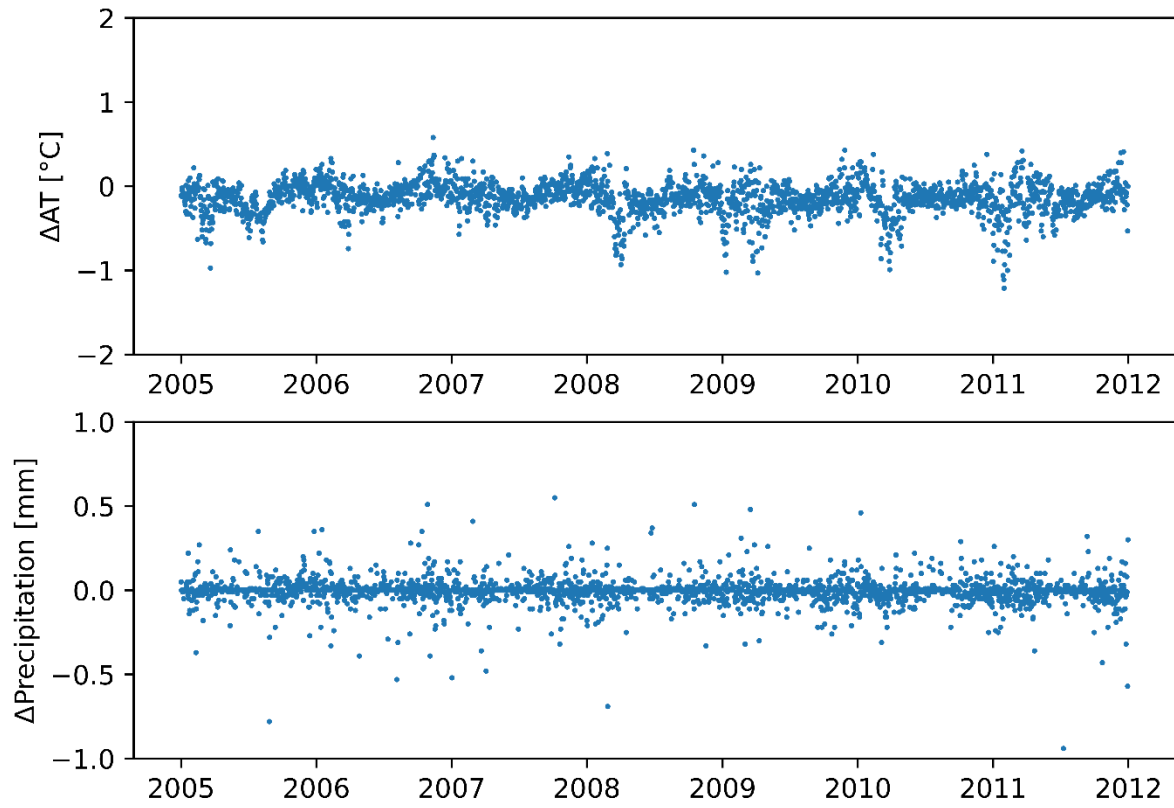

Figure S7 The differences in daily average air temperature (AT), and daily precipitation between the inner and outer fjord based on ERA-interim reanalysis (Dee et al., 2011).
